# Supplementary material for: Alterations in the health of hibernating bats under pathogen pressure
Source: PubMed Central journal article supplement (PMC5904171; doi:10.1038/s41598-018-24461-5), 2018-04-17
Supplement: 41598_2018_24461_MOESM1_ESM.pdf [file 41598_2018_24461_MOESM1_ESM.pdf]

**Title:** Alterations in the health of hibernating bats under pathogen pressure

**Authors:** Hana Bandouchova, Tomáš Bartonička, Hana Berkova, Jiri Brichta, Tomasz Kokurewicz, Veronika Kovacova, Petr Linhart, Vladimir Piacek, Jiri Pikula, Alexandra Zahradníková Jr., Jan Zukal

**Supplementary Table S1:** Data on fungal load, number of ultra-violet fluorescent skin lesions and blood parameters in *Myotis myotis* bats from Nietoperek (Poland), the Šimon and Juda mines (Czech Republic) and the Sloupsko-šošůvské caves (Czech Republic)

| <b>Country</b> | <b>Locality</b>         | <b>Bat</b> | <b>Na</b> | <b>K</b> | <b>Cl</b> | <b>tCO2</b> |
|----------------|-------------------------|------------|-----------|----------|-----------|-------------|
| Poland         | Nietoperek              | PLMMyo1    | 159       | 6.5      | 119       | 32          |
| Poland         | Nietoperek              | PLMMyo2    | 155       | 7.9      | 121       | 27          |
| Poland         | Nietoperek              | PLMMyo3    | 152       | 5        | 116       | 27          |
| Poland         | Nietoperek              | PLMMyo4    | 147       | 8.3      | 119       | 25          |
| Poland         | Nietoperek              | PLMMyo5    | 150       | 7.3      | 117       | 29          |
| Poland         | Nietoperek              | PLMMyo6    | 158       | 5.6      | 124       | 23          |
| Poland         | Nietoperek              | PLMMyo7    | 148       | 6.4      | 111       | 33          |
| Poland         | Nietoperek              | PLMMyo8    | 160       | 5.9      | 130       | 30          |
| Poland         | Nietoperek              | PLMMyo9    | 148       | 6        | 117       | 21          |
| Poland         | Nietoperek              | PLMMyo10   | 155       | 8.2      | 118       | 31          |
| Poland         | Nietoperek              | PLMMyo11   | 168       | 5.3      | 128       | 31          |
| Poland         | Nietoperek              | PLMMyo12   | 171       | 5.3      | 137       | 23          |
| Poland         | Nietoperek              | PLMMyo13   | 168       | 7        | 127       | 29          |
| Poland         | Nietoperek              | PLMMyo14   | 168       | 8.2      | 139       | 20          |
| Poland         | Nietoperek              | PLMMyo15   | 161       | 8        | 135       | 23          |
| Poland         | Nietoperek              | PLMMyo17   | 156       | 8.1      | 120       | 26          |
| Poland         | Nietoperek              | PLMMyo18   | 156       | 5.9      | 117       | 33          |
| Poland         | Nietoperek              | PLMMyo19   | 149       | 5.6      | 114       | 29          |
| Poland         | Nietoperek              | PLMMyo20   | 156       | 4.8      | 119       | 29          |
| Poland         | Nietoperek              | PLMMyo21   | 152       | 8.2      | 115       | 28          |
| Poland         | Nietoperek              | PLMMyo22   | 124       | 6.2      |           | 22          |
| Czech Republic | Mala Moravka            | MMMyo1     | 151       | 5.6      | 115       | 29          |
| Czech Republic | Mala Moravka            | MMMyo2     | 149       | 6        | 118       | 22          |
| Czech Republic | Mala Moravka            | MMMyo3     | 152       | 6.5      | 120       | 24          |
| Czech Republic | Mala Moravka            | MMMyo4     | 152       | 9.1      | 129       | 22          |
| Czech Republic | Mala Moravka            | MMMyo5     | 161       | 6.3      | 135       | 22          |
| Czech Republic | Mala Moravka            | MMMyo6     | 162       | 7.7      |           |             |
| Czech Republic | Mala Moravka            | MMMyo7     | 148       | 8.1      | 117       | 26          |
| Czech Republic | Mala Moravka            | MMMyo8     | 151       | 4.3      | 119       | 24          |
| Czech Republic | Mala Moravka            | MMMyo9     | 149       | 6.7      | 118       | 25          |
| Czech Republic | Mala Moravka            | MMMyo10    | 149       | 7.7      | 124       | 18          |
| Czech Republic | Mala Moravka            | MMMyo11    | 157       | 7.7      | 136       | 18          |
| Czech Republic | Mala Moravka            | MMMyo12    | 143       | 7.1      | 109       | 26          |
| Czech Republic | Mala Moravka            | MMMyo13    | 152       | 6.5      | 119       | 23          |
| Czech Republic | Mala Moravka            | MMMyo14    | 143       | 8.2      | 115       | 22          |
| Czech Republic | Mala Moravka            | MMMyo16    | 141       | 6.4      | 119       | 17          |
| Czech Republic | Mala Moravka            | MMMyo17    | 146       | 8.5      | 122       | 21          |
| Czech Republic | Mala Moravka            | MMMyo18    | 138       | 9.1      | 113       | 23          |
| Czech Republic | Mala Moravka            | MMMyo19    | 134       | 6.1      | 114       | 16          |
| Czech Republic | Mala Moravka            | MMMyo20    | 133       | 8.5      | 103       | 21          |
| Czech Republic | Mala Moravka            | MMMyo30    | 142       | 7.7      | 115       | 17          |
| Czech Republic | Mala Moravka            | MMMyo31    | 145       | 9.1      | 130       | 22          |
| Czech Republic | Sloupsko-šošůvské caves | SLMMyo1    | 151       | 7.4      | 124       | 25          |
| Czech Republic | Sloupsko-šošůvské caves | SLMMyo2    | 152       | 5.7      | 115       | 27          |
| Czech Republic | Sloupsko-šošůvské caves | SLMMyo4    | 159       | 6.3      | 133       | 21          |
| Czech Republic | Sloupsko-šošůvské caves | SLMMyo5    | 157       | 6.5      | 125       | 27          |
| Czech Republic | Sloupsko-šošůvské caves | SLMMyo6    | 159       | 5.6      | 130       | 20          |
| Czech Republic | Sloupsko-šošůvské caves | SLMMyo7    | 158       | 8.5      | 127       | 26          |
| Czech Republic | Sloupsko-šošůvské caves | SLMMyo8    | 155       | 8        | 127       | 21          |

|                |                         |          |     |     |     |    |
|----------------|-------------------------|----------|-----|-----|-----|----|
| Czech Republic | Sloupsko-šošůvské caves | SLMMyo9  | 156 | 6.3 | 125 | 24 |
| Czech Republic | Sloupsko-šošůvské caves | SLMMyo10 | 156 | 5.8 | 126 | 21 |
| Czech Republic | Sloupsko-šošůvské caves | SLMMyo11 | 150 | 6   | 119 | 21 |
| Czech Republic | Sloupsko-šošůvské caves | SLMMyo12 | 159 | 5.7 | 131 | 18 |
| Czech Republic | Sloupsko-šošůvské caves | SLMMyo13 | 151 | 4.9 | 120 | 27 |
| Czech Republic | Sloupsko-šošůvské caves | SLMMyo15 | 157 | 6.8 | 126 | 23 |
| Czech Republic | Sloupsko-šošůvské caves | SLMMyo16 | 145 | 7.8 | 123 | 22 |
| Czech Republic | Sloupsko-šošůvské caves | SLMMyo17 | 157 | 7.3 | 132 | 24 |
| Czech Republic | Sloupsko-šošůvské caves | SLMMyo18 | 160 | 7.7 | 128 | 27 |
| Czech Republic | Sloupsko-šošůvské caves | SLMMyo19 | 146 | 7.2 | 122 | 22 |
| Poland         | Nietoperek              | PL1      | 163 | 5.9 | 132 | 24 |
| Poland         | Nietoperek              | PL2      | 158 | 5.1 | 125 | 25 |
| Poland         | Nietoperek              | PL3      | 142 | 6.5 | 111 | 28 |
| Poland         | Nietoperek              | PL4      | 159 | 6.3 | 131 | 24 |
| Poland         | Nietoperek              | PL5      | 161 | 6   | 132 | 23 |
| Poland         | Nietoperek              | PL6      | 158 | 5.9 | 133 | 21 |
| Poland         | Nietoperek              | PL7      | 147 | 8.5 | 121 | 25 |
| Poland         | Nietoperek              | PL8      | 164 | 5.7 | 130 |    |
| Poland         | Nietoperek              | PL9      | 157 | 5.8 | 129 | 25 |
| Poland         | Nietoperek              | PL10     | 162 | 9.1 | 136 | 23 |
| Poland         | Nietoperek              | PL11     | 162 | 7.3 | 136 | 20 |
| Poland         | Nietoperek              | PL12     | 151 | 9.1 | 130 | 21 |
| Poland         | Nietoperek              | PL13     | 145 | 6.1 | 117 | 24 |
| Poland         | Nietoperek              | PL14     | 167 | 6.6 | 131 | 26 |
| Poland         | Nietoperek              | PL15     | 151 | 3.2 | 117 | 27 |
| Poland         | Nietoperek              | PL16     | 156 | 6.6 | 124 | 28 |
| Poland         | Nietoperek              | PL18     | 152 | 7.3 | 127 | 21 |
| Poland         | Nietoperek              | PL19     | 152 | 6   | 121 | 26 |
| Poland         | Nietoperek              | PL20     | 151 | 4.8 | 114 | 27 |
| Poland         | Nietoperek              | PL21     | 156 | 4.5 | 124 |    |

| Urea | Glucose | Haematocrit | pH    | pCO2 | HCO3 | BE  | AnGAP | Hb  |
|------|---------|-------------|-------|------|------|-----|-------|-----|
| 27.6 | 10      | 60          | 7.263 | 8.95 | 30.3 | 3   | 16    | 204 |
| 19   | 7.7     | 58          | 7.279 | 7.32 | 25.7 | -1  | 17    | 197 |
| 6    | 5.7     | 49          | 7.382 | 5.7  | 25.4 | 0   | 15    | 167 |
| 14   | 7.1     | 59          | 7.275 | 6.73 | 23.5 | -3  | 13    | 201 |
| 24.3 | 5.9     | 59          | 7.363 | 6.5  | 27.7 | 2   | 13    | 201 |
| 18.5 | 7.5     | 54          | 7.288 | 6.15 | 22.1 | -5  | 18    | 184 |
| 9    | 4.4     | 56          | 7.365 | 7.31 | 31.3 | 6   | 12    | 190 |
| 20.3 | 1.5     | 55          | 7.303 | 7.48 | 27.8 | 1   | 8     | 187 |
| 10.1 | 7.7     | 54          | 7.3   | 5.37 | 19.8 | -7  | 17    | 184 |
| 36   | 6.3     | 55          | 7.3   | 7.94 | 29.3 | 3   | 15    | 187 |
| 17.6 | 5.9     | 53          | 7.343 | 7.28 | 29.7 | 4   | 15    | 180 |
| 28.7 | 5.6     | 60          | 7.281 | 6.07 | 21.4 | -5  | 18    | 204 |
| 19.7 | 6.7     | 61          | 7.275 | 7.94 | 27.7 | 1   | 20    | 207 |
| 27.3 | 8       | 55          | 7.258 | 5.51 | 18.5 | -9  | 19    | 187 |
| 38.7 | 4.9     | 57          | 7.298 | 5.82 | 21.4 | -5  | 13    | 194 |
| 27.3 | 4.9     | 61          | 7.378 | 5.58 | 24.7 | 0   | 20    | 207 |
| 20.7 | 5.7     | 54          | 7.384 | 7.07 | 31.7 | 7   | 13    | 184 |
| 13   | 8.4     | 56          | 7.433 | 5.46 | 27.4 | 3   | 13    | 190 |
| 23.2 | 5.5     | 58          | 7.362 | 6.45 | 27.4 | 2   | 14    | 197 |
| 10.3 | 5.9     | 55          | 7.308 | 7.13 | 26.8 | 1   | 18    | 187 |
| 33   | 11.6    | 39          | 7.332 | 5.17 | 20.6 | -5  |       | 133 |
| 16   | 4.2     | 57          | 7.371 | 6.44 | 28   | 3   | 13    | 194 |
| 20.5 | 6.8     | 55          | 7.187 | 7.07 | 20.1 | -8  | 17    | 187 |
| 20.1 | 7.2     | 56          | 7.346 | 5.64 | 23.2 | -3  | 15    | 190 |
| 25.2 | 3.1     | 65          | 7.225 | 6.59 | 20.5 | -7  |       | 221 |
| 27   | 2.7     | 60          | 7.232 | 6.61 | 20.9 | -7  | 11    | 204 |
| 11.9 | 5.4     | 51          | 7.268 | 7.2  | 24.6 | -2  | 14    | 173 |
| 15.2 | 5.4     | 56          | 7.262 | 6.64 | 22.5 | -5  | 13    | 190 |
| 16.6 | 5.7     | 58          | 7.281 | 6.69 | 23.6 | -3  | 14    | 197 |
| 24.9 | 7       | 53          | 7.244 | 5.2  | 16.9 | -10 | 16    | 180 |
| 35.7 | 3.4     | 55          | 7.12  | 6.81 | 16.6 | -13 | 12    | 187 |
| 10   | 7.2     | 54          | 7.244 | 7.48 | 24.2 | -3  | 17    | 184 |
| 21.7 | 6.9     | 57          | 7.291 | 5.98 | 21.6 | -5  | 18    | 194 |
| 15.7 | 8.8     | 56          | 7.289 | 5.67 | 20.4 | -6  | 16    | 190 |
| 17.7 | 12      | 47          | 7.222 | 5.09 | 15.7 | -12 | 13    | 160 |
| 24.6 | 5.2     | 55          | 7.256 | 5.77 | 19.3 | -8  | 12    | 187 |
| 19.9 | 9.8     | 57          | 7.301 | 5.91 | 21.9 | -5  |       | 194 |
| 48.9 | 5.8     | 64          | 7.223 | 4.82 | 14.9 | -13 |       | 218 |
| 17.6 | 6.5     | 57          | 7.383 | 4.49 | 20.1 | -5  | 18    | 194 |
| 31.2 | 9.4     | 57          | 7.137 | 6.29 | 16   | -13 | 18    | 194 |
| 31.7 | 4.3     | 58          | 7.079 | 8.91 | 19.8 | -10 |       | 197 |
| 26.4 | 4.7     | 54          | 7.225 | 7.48 | 23.2 | -4  | 11    | 184 |
| 13.2 | 5.8     | 55          | 7.262 | 7.5  | 25.4 | -2  | 17    | 187 |
| 32.5 | 6.6     | 57          | 7.256 | 5.98 | 19.9 | -7  | 13    | 194 |
| 24.1 | 8.2     | 58          | 7.237 | 7.95 | 25.4 | -2  | 13    | 197 |
| 18.9 | 4.4     | 54          | 7.179 | 6.49 | 18.1 | -10 | 16    | 184 |
| 29.8 | 3.4     | 62          | 7.332 | 6.12 | 24.3 | -2  | 15    | 211 |
| 35   | 6       | 59          | 7.181 | 6.86 | 19.3 | -9  | 17    | 201 |

|      |      |    |       |      |      |     |    |     |
|------|------|----|-------|------|------|-----|----|-----|
| 21.4 | 4.2  | 62 | 7.299 | 6.06 | 22.3 | -4  | 15 | 211 |
| 16.9 | 7.3  | 45 | 7.225 | 6.4  | 19.9 | -8  | 15 | 153 |
| 11.8 | 7.8  | 54 | 7.245 | 5.93 | 19.3 | -8  | 17 | 184 |
| 27.5 | 7.1  | 57 | 7.235 | 5.2  | 16.5 | -11 | 17 | 194 |
| 11.5 | 4.8  | 50 | 7.276 | 7.29 | 25.4 | -1  | 10 | 170 |
| 20.9 | 5.2  | 61 | 7.278 | 6.22 | 21.9 | -5  | 16 | 207 |
| 21.2 | 4.2  | 54 | 7.295 | 5.68 | 20.7 | -6  | 10 | 184 |
| 40.5 | 2.7  | 51 | 7.296 | 6.19 | 22.7 | -4  | 9  | 173 |
| 21.9 | 4.1  | 63 | 7.211 | 8.36 | 25.2 | -3  | 15 | 214 |
| 15.5 | 3.8  | 51 | 7.264 | 5.96 | 20.2 | -7  | 11 | 173 |
| 19   | 5    | 58 | 7.316 | 5.9  | 22.6 | -4  | 14 | 197 |
| 23.6 | 9.4  | 56 | 7.294 | 6.41 | 23.3 | -3  | 14 | 190 |
| 14.3 | 6.1  | 46 | 7.397 | 5.84 | 27   | 2   | 10 | 156 |
| 22.2 | 5.6  | 56 | 7.275 | 6.51 | 22.7 | -4  | 12 | 190 |
| 16.6 | 6.4  | 58 | 7.265 | 6.46 | 22   | -5  | 14 | 197 |
| 33   | 5.6  | 53 | 7.243 | 6.01 | 19,4 | -8  | 12 | 180 |
| 17.3 | 6.5  | 46 | 7.264 | 6.83 | 23.2 | -4  | 11 | 156 |
| 40.5 | 6.5  | 57 |       |      |      |     |    | 194 |
| 23.3 | 4.9  | 58 | 7.286 | 6.69 | 23.9 | -3  | 10 | 197 |
| 22.3 | 6.4  | 66 | 7.226 | 6.82 | 21.3 | -6  |    | 224 |
| 32.3 | 14.8 | 52 | 7.289 | 5.19 | 18.7 | -8  | 15 | 177 |
| 20.7 | 10.1 | 55 | 7.282 | 5.55 | 19.7 | -7  |    | 187 |
| 19.2 | 7.5  | 55 | 7.341 | 5.67 | 23   | -3  | 12 | 187 |
| 18.1 | 10.3 | 61 | 7.249 | 7.34 | 24.1 | -3  | 18 | 207 |
| 12.9 | 7.2  | 53 | 7.29  | 7.12 | 25.7 | -1  | 12 | 180 |
| 19.6 | 8    | 56 | 7.342 | 6.46 | 26.3 | 1   | 13 | 190 |
| 27.3 | 2.8  | 57 | 7.257 | 5.96 | 19.9 | -7  | 12 | 194 |
| 19.8 | 6.7  | 48 | 7.283 | 6.78 | 24.1 | -3  | 13 | 163 |
| 12.4 | 5    | 46 | 7.341 | 6.3  | 25.6 | 0   | 16 | 156 |
| 15.5 | 8.8  | 51 |       |      |      |     |    | 173 |

| Neutrophils | Lymphocytes | Eosinophils | Monocytes | Basophils | Skin lesions (UV left wing) |
|-------------|-------------|-------------|-----------|-----------|-----------------------------|
| 9           | 88          | 1           | 2         | 0         | 13                          |
| 8           | 90          | 1           | 1         | 0         | 6                           |
| 16          | 81          | 0           | 0         | 3         | 10                          |
| 17          | 82          | 2           | 1         | 0         | 129                         |
| 43          | 56          | 0           | 1         | 0         | 30                          |
| 14          | 85          | 0           | 1         | 0         | 5                           |
| 7           | 93          | 0           | 0         | 0         | 0                           |
| 13          | 87          | 0           | 0         | 0         | 52                          |
| 14          | 86          | 0           | 0         | 0         | 25                          |
| 13          | 85          | 1           | 1         | 0         | 13                          |
| 36          | 64          | 0           | 0         | 0         | 38                          |
| 20          | 80          | 0           | 0         | 0         | 34                          |
| 23          | 77          | 0           | 0         | 0         | 3                           |
| 13          | 87          | 0           | 0         | 0         | 50                          |
| 76          | 23          | 0           | 1         | 0         | 125                         |
| 39          | 61          | 0           | 0         | 0         | 0                           |
| 32          | 68          | 0           | 0         | 0         | 87                          |
| 57          | 42          | 1           | 0         | 0         | 5                           |
| 28          | 72          | 0           | 0         | 0         | 6                           |
| 25          | 75          | 0           | 0         | 0         | 116                         |
| 30          | 69          | 1           | 0         | 0         | 72                          |
| 55          | 45          | 0           | 0         | 0         | 681                         |
| 41          | 57          | 2           | 0         | 0         | 168                         |
| 54          | 45          | 0           | 1         | 0         | 283                         |
| 51          | 46          | 3           | 0         | 0         | 696                         |
| 42          | 57          | 1           | 0         | 0         | 67                          |
| 83          | 17          | 0           | 0         | 0         | 3013                        |
| 30          | 68          | 1           | 1         | 0         | 521                         |
| 22          | 76          | 1           | 1         | 0         | 268                         |
| 42          | 56          | 2           | 0         | 0         | 114                         |
| 52          | 48          | 0           | 0         | 0         | 682                         |
| 75          | 25          | 0           | 0         | 0         | 860                         |
| 40          | 59          | 1           | 0         | 0         | 85                          |
| 56          | 44          | 0           | 0         | 0         | 24                          |
| 39          | 59          | 1           | 0         | 1         | 194                         |
| 70          | 30          | 0           | 0         | 0         | 126                         |
| 48          | 52          | 0           | 0         | 0         | 214                         |
| 21          | 89          | 0           | 0         | 0         | 123                         |
| 43          | 57          | 0           | 0         | 0         | 432                         |
| 46          | 53          | 1           | 0         | 0         | 83                          |
| 60          | 40          | 0           | 0         | 0         | 34                          |
| 27          | 68          | 5           | 0         | 0         | 860                         |
| 28          | 71          | 1           | 0         | 0         | 116                         |
| 19          | 74          | 0           | 6         | 1         | 24                          |
| 20          | 79          | 0           | 1         | 0         | 133                         |
| 37          | 63          | 0           | 0         | 0         | 9                           |
| 20          | 77          | 3           | 0         | 0         | 106                         |
| 45          | 55          | 0           | 0         | 0         | 72                          |
| 34          | 62          | 4           | 0         | 0         | 91                          |

|    |    |   |   |   |     |
|----|----|---|---|---|-----|
| 43 | 57 | 0 | 0 | 0 | 193 |
| 36 | 62 | 2 | 0 | 0 | 192 |
| 8  | 89 | 3 | 0 | 0 | 0   |
| 32 | 67 | 1 | 0 | 0 | 69  |
| 39 | 61 | 0 | 0 | 0 | 103 |
| 44 | 54 | 2 | 0 | 0 | 211 |
| 51 | 47 | 2 | 0 | 0 | 60  |
| 15 | 84 | 1 | 0 | 0 | 295 |
| 55 | 45 | 0 | 0 | 0 | 26  |
| 27 | 72 | 1 | 0 | 0 | 13  |
|    |    |   |   |   | 249 |
|    |    |   |   |   | 0   |
|    |    |   |   |   | 8   |
|    |    |   |   |   | 2   |
|    |    |   |   |   | 0   |
|    |    |   |   |   | 0   |
|    |    |   |   |   | 3   |
|    |    |   |   |   | 5   |
|    |    |   |   |   | 2   |
|    |    |   |   |   | 1   |
|    |    |   |   |   | 2   |
|    |    |   |   |   | 36  |
|    |    |   |   |   | 4   |
|    |    |   |   |   | 4   |
|    |    |   |   |   | 29  |
|    |    |   |   |   | 27  |
|    |    |   |   |   | 302 |
|    |    |   |   |   | 421 |
|    |    |   |   |   | 125 |
|    |    |   |   |   | 3   |

| Skin lesions (UV right wing) | Skin lesions (UV total) | Hibernation temperature |
|------------------------------|-------------------------|-------------------------|
| 13                           | 26                      | 7.6                     |
| 1                            | 7                       | 8.6                     |
| 2                            | 12                      | 8.6                     |
| 35                           | 164                     | 9.3                     |
| 89                           | 119                     | 9.8                     |
| 1                            | 6                       | 11                      |
| 2                            | 2                       | 8.3                     |
| 8                            | 60                      | 8.5                     |
| 114                          | 139                     | 8.5                     |
| 16                           | 29                      | 8.6                     |
| 244                          | 282                     | 8.1                     |
| 29                           | 63                      | 7.6                     |
| 19                           | 22                      | 7.8                     |
| 69                           | 119                     | 8.4                     |
| 96                           | 221                     | 8.7                     |
| 0                            | 0                       | 10.8                    |
| 476                          | 563                     | 9.5                     |
| 21                           | 26                      | 9.4                     |
| 10                           | 16                      | 9.3                     |
| 241                          | 357                     |                         |
| 60                           | 132                     |                         |
| 1234                         | 1915                    | 4.6                     |
| 337                          | 505                     | 5.2                     |
| 236                          | 519                     | 5.3                     |
| 374                          | 1070                    | 4.5                     |
| 86                           | 153                     | 4.2                     |
| 3782                         | 6795                    | 4.6                     |
| 685                          | 1206                    | 4.3                     |
| 512                          | 780                     | 4.5                     |
| 242                          | 356                     | 5.2                     |
| 132                          | 814                     | 4.6                     |
| 1534                         | 2394                    | 5.3                     |
| 84                           | 169                     | 4.5                     |
| 24                           | 48                      | 4.3                     |
| 102                          | 296                     | 4.6                     |
| 104                          | 230                     | 4.6                     |
| 176                          | 390                     | 4.2                     |
| 157                          | 280                     | 4.6                     |
| 444                          | 876                     | 5.3                     |
| 46                           | 129                     | 4.2                     |
| 148                          | 182                     | 5.2                     |
| 630                          | 1490                    | 4.3                     |
| 148                          | 264                     | 6.1                     |
| 56                           | 80                      | 6.2                     |
| 283                          | 416                     | 6.3                     |
| 14                           | 23                      | 6.3                     |
| 58                           | 164                     | 6.4                     |
| 96                           | 168                     | 6.6                     |
| 93                           | 184                     | 6.4                     |



|     |     |      |
|-----|-----|------|
| 413 | 606 | 6.7  |
| 237 | 429 | 6.5  |
| 2   | 2   | 6.3  |
| 173 | 242 | 6.5  |
| 210 | 313 | 6.5  |
| 358 | 569 | 6.3  |
| 49  | 109 | 6.3  |
| 310 | 605 | 6.4  |
| 49  | 75  | 6.4  |
| 3   | 16  | 6.4  |
| 220 | 469 | 9.3  |
| 0   | 0   | 9.9  |
| 10  | 18  | 10.7 |
| 5   | 7   | 10.1 |
| 2   | 2   | 9.3  |
| 7   | 7   | 11.1 |
| 35  | 38  | 8.7  |
| 8   | 13  | 8.9  |
| 1   | 3   | 8.7  |
| 0   | 1   | 8.6  |
| 27  | 29  | 8.5  |
| 45  | 81  | 8.4  |
| 4   | 8   | 8.4  |
| 17  | 21  | 8    |
| 104 | 133 | 8.5  |
| 8   | 35  | 8.6  |
| 348 | 650 | 11   |
| 34  | 455 | 10.4 |
| 12  | 137 | 9    |
| 19  | 22  | 8.7  |

| Forearm length | Body mass | BMI               | Date of sampling | Sex |
|----------------|-----------|-------------------|------------------|-----|
| 63.3           | 29.5      | 0.466034755134281 | 19.03.2015       | f   |
| 62.8           | 22.5      | 0.35828025477707  | 19.03.2015       | m   |
| 62.2           | 27        | 0.434083601286174 | 19.03.2015       | f   |
| 61             | 26        | 0.426229508196721 | 19.03.2015       | f   |
| 59.4           | 23        | 0.387205387205387 | 19.03.2015       | m   |
| 58.9           | 23.5      | 0.398981324278438 | 19.03.2015       | m   |
| 60.6           | 26.5      | 0.437293729372937 | 19.03.2015       | m   |
| 57.9           | 22        | 0.379965457685665 | 19.03.2015       | m   |
| 58.4           | 22.5      | 0.38527397260274  | 19.03.2015       | f   |
| 63.2           | 26        | 0.411392405063291 | 19.03.2015       | f   |
| 61.7           | 24.5      | 0.39708265802269  | 19.03.2015       | f   |
| 59.1           | 21.5      | 0.363790186125212 | 19.03.2015       | m   |
| 62.4           | 27        | 0.432692307692308 | 19.03.2015       | f   |
| 60.2           | 23        | 0.382059800664452 | 19.03.2015       | f   |
| 60.3           | 23.5      | 0.38971807628524  | 19.03.2015       | f   |
| 60.9           | 22.5      | 0.369458128078818 | 19.03.2015       | m   |
| 60             | 24        | 0.4               | 19.03.2015       | m   |
| 60.9           | 25.5      | 0.41871921182266  | 19.03.2015       | m   |
| 59.7           | 24        | 0.402010050251256 | 19.03.2015       | m   |
| 60.1           | 22        | 0.366056572379368 | 19.03.2015       | f   |
| 57.7           | 21.5      | 0.37261698440208  | 19.03.2015       | m   |
| 59.2           | 22.8      | 0.385135135135135 | 03.04.2015       | m   |
| 60.2           | 26        | 0.431893687707641 | 03.04.2015       | m   |
| 59.6           | 23.2      | 0.389261744966443 | 03.04.2015       | m   |
| 60.8           | 27.2      | 0.447368421052632 | 03.04.2015       | m   |
| 58.3           | 24.8      | 0.425385934819897 | 03.04.2015       | m   |
| 65.1           | 23.4      | 0.359447004608295 | 03.04.2015       | f   |
| 61.3           | 25.2      | 0.411092985318108 | 03.04.2015       | f   |
| 61.2           | 27.5      | 0.449346405228758 | 03.04.2015       | m   |
| 61.4           | 25.5      | 0.415309446254072 | 03.04.2015       | m   |
| 59             | 22.5      | 0.38135593220339  | 03.04.2015       | m   |
| 59.3           | 22        | 0.370994940978078 | 03.04.2015       | m   |
| 62.2           | 24.6      | 0.395498392282958 | 03.04.2015       | m   |
| 58.8           | 24.8      | 0.421768707482993 | 03.04.2015       | m   |
| 62             | 24.5      | 0.395161290322581 | 03.04.2015       | f   |
| 59.7           | 24.2      | 0.40536013400335  | 03.04.2015       | m   |
| 60.2           | 24        | 0.398671096345515 | 03.04.2015       | m   |
| 60.6           | 21.8      | 0.35973597359736  | 03.04.2015       | m   |
| 60.4           | 23.6      | 0.390728476821192 | 03.04.2015       | m   |
| 64.2           | 25.5      | 0.397196261682243 | 03.04.2015       | f   |
| 60.4           | 23.5      | 0.389072847682119 | 03.04.2015       | m   |
| 60.7           | 23.5      | 0.387149917627677 | 03.04.2015       | m   |
| 61.2           | 19.5      | 0.318627450980392 | 17.04.2015       | f   |
| 59.8           | 23        | 0.384615384615385 | 17.04.2015       | m   |
| 60             | 21.5      | 0.358333333333333 | 17.04.2015       | m   |
| 57.7           | 21        | 0.363951473136915 | 17.04.2015       | m   |
| 61.9           | 22.5      | 0.363489499192246 | 17.04.2015       | f   |
| 58.2           | 21.5      | 0.369415807560137 | 17.04.2015       | m   |
| 61.8           | 21.5      | 0.34789644012945  | 17.04.2015       | f   |

|      |      |                   |            |   |
|------|------|-------------------|------------|---|
| 59.7 | 22   | 0.368509212730318 | 17.04.2015 | m |
| 58.6 | 19   | 0.324232081911263 | 17.04.2015 | m |
| 60.6 | 24   | 0.396039603960396 | 17.04.2015 | m |
| 59.5 | 21   | 0.352941176470588 | 17.04.2015 | m |
| 62.8 | 21.5 | 0.342356687898089 | 17.04.2015 | f |
| 58.1 | 22.5 | 0.387263339070568 | 17.04.2015 | m |
| 60.4 | 23   | 0.380794701986755 | 17.04.2015 | m |
| 61   | 19   | 0.311475409836066 | 17.04.2015 | m |
| 62.2 | 23   | 0.369774919614148 | 17.04.2015 | f |
| 61.9 | 23   | 0.37156704361874  | 17.04.2015 | f |
| 65.3 | 25.5 | 0.390505359877489 | 19.03.2016 | f |
| 61.1 | 27   | 0.44189852700491  | 19.03.2016 | f |
| 59.8 | 23.5 | 0.392976588628763 | 19.03.2016 | m |
| 62.2 | 27   | 0.434083601286174 | 19.03.2016 | f |
| 58.9 | 26.5 | 0.449915110356537 | 19.03.2016 | f |
| 62.3 | 24.5 | 0.393258426966292 | 19.03.2016 | f |
| 63.4 | 29.5 | 0.465299684542587 | 19.03.2016 | f |
| 62.7 | 24.5 | 0.390749601275917 | 19.03.2016 | f |
| 64.7 | 26   | 0.401854714064915 | 19.03.2016 | f |
| 61.6 | 23.5 | 0.381493506493506 | 19.03.2016 | f |
| 62.3 | 23.5 | 0.377207062600321 | 19.03.2016 | f |
| 60.8 | 24.5 | 0.402960526315789 | 19.03.2016 | f |
| 63.7 | 26   | 0.408163265306122 | 20.03.2016 | f |
| 62.2 | 27.5 | 0.442122186495177 | 20.03.2016 | f |
| 61   | 26.5 | 0.434426229508197 | 20.03.2016 | m |
| 61   | 23.5 | 0.385245901639344 | 20.03.2016 | f |
| 61.4 | 22.5 | 0.366449511400651 | 20.03.2016 | f |
| 63.2 | 28   | 0.443037974683544 | 20.03.2016 | f |
| 63.4 | 29   | 0.457413249211356 | 20.03.2016 | f |
| 64.4 | 26.5 | 0.411490683229814 | 20.03.2016 | f |

| <b>Age</b> | <b><i>P. destructans</i> load</b> |
|------------|-----------------------------------|
| ad         | 0.0544381576671936                |
| sad        | 0.0195816132423898                |
| ad         | 0.0315364732510184                |
| ad         | 0.406571263383282                 |
| ad         | 0.222597436516891                 |
| ad         | 0.0408112831287848                |
| sad        | 0                                 |
| ad         | 0.0233714060970526                |
| ad         | 0.00549888258219571               |
| ad         | 0.113760301053183                 |
| ad         | 0.059747049689906                 |
| ad         | 0.0675026806788231                |
| ad         | 0.041553840143751                 |
| ad         | 0.431682949720439                 |
| ad         | 0.0144964924865044                |
| ad         | 0.0537394386314814                |
| sad        | 0.121088705876972                 |
| ad         | 0.0320096283950525                |
| sad        | 0.210114529801154                 |
| ad         | 2.1192557618197                   |
| ad         |                                   |
| ad         | 0.293016297584994                 |
| sad        | 2.15575309740245                  |
| ad         | 5.89379001335643                  |
| ad         | 6.28658041074651                  |
| sad        | 0.116562630739205                 |
| ad         | 12.8274274255086                  |
| ad         | 1.98338138425553                  |
| ad         | 3.453464712462                    |
| ad         | 1.18362826207467                  |
| ad         | 7.51256395713623                  |
| ad         | 3.18607350575418                  |
| ad         | 0.254616524301805                 |
| ad         | 0.214000948045937                 |
| ad         | 7.50438012445076                  |
| ad         | 3.53494002926166                  |
| ad         | 2.80108679569021                  |
| sad        | 0.444932395635932                 |
| ad         | 4.90667606981103                  |
| ad         | 0.489811963348835                 |
| ad         |                                   |
| ad         |                                   |
| ad         | 0.0379206345668535                |
| ad         | 0.646759896423162                 |
| ad         | 0.268637359142226                 |
| ad         | 0.00807725522405844               |
| ad         | 1.9553719533215                   |
| ad         | 0.57364042054793                  |
| sad        | 1.27785721871048                  |

|     |                      |
|-----|----------------------|
| ad  | 0.158241916070859    |
| sad | 2.2474165598117      |
| sad | 0.128478183413083    |
| sad | 1.44281710450792     |
| ad  | 0.379148757898925    |
| ad  | 0.463752372086016    |
| ad  | 0.107421748315307    |
| sad | 6.31107380153283     |
| sad | 0.250009532607537    |
| ad  | 2.89837298388187     |
| ad  | 0.431108757145475    |
| ad  | 0.00186974011587723  |
| ad  | 0.00560856275655036  |
| ad  | 0.00688468798755705  |
| ad  | 0.00102746008112895  |
| ad  | 0.00105081983519282  |
| ad  | 0.00169423861177047  |
| ad  | 0.0243818850467132   |
| ad  | 0.000546370253145353 |
| ad  | 0.00611631201645431  |
| sad | 0.113085104867628    |
| ad  | 0.0982746697209541   |
| ad  | 0.0033280176280996   |
| ad  | 0.139322409362806    |
| ad  | 0.212304323216677    |
| ad  | 0.0134815948574919   |
| ad  | 1.58324203414883     |
| ad  | 0.00722672012886443  |
| ad  | 0.000726740061844778 |
| ad  | 0.00326344712294369  |
